# Supplementary material for: Larval assemblages over the abyssal plain in the Pacific are highly diverse and spatially patchy
Source: PeerJ journal article supplement (doi:10.7717/peerj.7691), 2019-09-26
Supplement: FigureS3_Submission.pdf [file FigureS3_Submission.pdf]

**A****18S\_V1&2**  
(34)**18S\_V7&8**  
(41)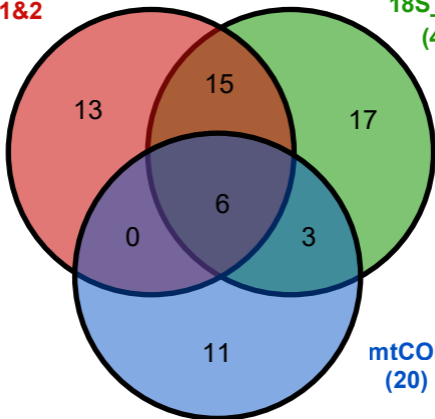**mtCOI**  
(20)**B****18S\_V1&2**  
(29)**18S\_V7&8**  
(29)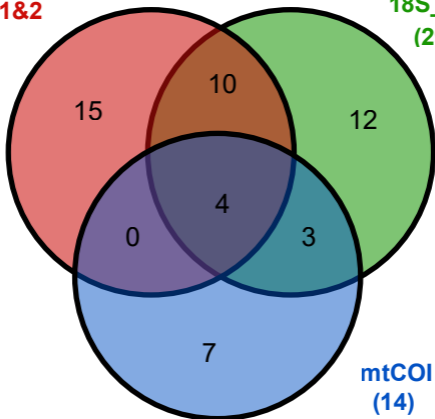**mtCOI**  
(14)
